# Supplementary material for: Ceftazidime/Avibactam-Based Versus Polymyxin B-Based Therapeutic Regimens for the Treatment of Carbapenem-Resistant Klebsiella pneumoniae Infection in Critically Ill Patients: A Retrospective Cohort Study
Source: PubMed Central journal article supplement — Infect Dis Ther. 2022 Aug 17;11(5):1917–34. doi: 10.1007/s40121-022-00682-0 (PMC9618002; doi:10.1007/s40121-022-00682-0), 2022-08-17
Supplement: 40121_2022_682_MOESM1_ESM.pdf [file 40121_2022_682_MOESM1_ESM.pdf]

# **Ceftazidime/avibactam-based versus polymyxin B-based therapeutic regimens for the treatment of carbapenem-resistant *Klebsiella pneumoniae* infection in critically ill patients: a retrospective cohort study**

Guanhao Zheng<sup>1,2†</sup>, Jiaqi Cai<sup>3†\*</sup>, Liang Zhang<sup>4</sup>, Dayu Chen<sup>5</sup>, Linyu Wang<sup>6</sup>, Yusi Qiu<sup>7</sup>, Han Deng<sup>8</sup>,  
Hao Bai<sup>9</sup>, Xiaolan Bian<sup>1\*</sup>, Juan He<sup>1\*</sup>

## **Authors' information**

1. Department of Pharmacy, Ruijin Hospital Affiliated to Shanghai Jiao Tong University School of Medicine, Shanghai, China.

2. Department of Pharmacy, Shanghai Chest Hospital, Shanghai Jiao Tong University, Shanghai, China.

3. Department of Clinical Laboratory, Kunshan Hospital Affiliated to Nanjing University of Chinese Medicine, Kunshan, China.

4. Department of Pharmacy, Huashan Hospital Affiliated to Fudan University, Shanghai, China.

5. Department of Pharmacy, Nanjing Drum Tower Hospital The Affiliated Hospital of Nanjing University Medical School, Nanjing, China.

6. Department of Pharmacy, The Affiliated Cancer Hospital of Guangxi Medical University, Nanning, China.

7. Department of Pharmacy, Guigang People's Hospital, Guigang, China.

8. Department of International Medical Center, Shenzhen Hospital, Southern Medical University, Shenzhen, China.

9. Department of pharmacy, Chongqing University Cancer Hospital, Chongqing, China.

---

† These authors have contributed equally to this work and share first authorship.

\* Correspondence should be addressed to ① Juan He, Department of Pharmacy, Ruijin Hospital Affiliated to Shanghai JiaoTong University School of Medicine, Shanghai, China, E-mail: [hejuanwin@126.com](mailto:hejuanwin@126.com); ② Xiao-lan Bian, Department of Pharmacy, Ruijin Hospital Affiliated to Shanghai JiaoTong University School of Medicine, Shanghai, China, E-mail: [bxl70029@163.com](mailto:bxl70029@163.com).

**Table S1.** Antimicrobial susceptibility characteristics of *Klebsiella pneumoniae* isolates.

| Antimicrobial agent | MIC range       | S <sup>a</sup> (%) | I <sup>b</sup> (%) | R <sup>c</sup> (%) |
|---------------------|-----------------|--------------------|--------------------|--------------------|
| CAZ/AVI             | <20 mm–>21 mm   | 96.3               | N/A <sup>d</sup>   | 3.7                |
| Colistin            | 0.125–0.5 µg/ml | 100                | N/A                | 0                  |
| Meropenem           | ≥16 µg/ml       | 0                  | 0                  | 100                |
| Imipenem            | ≥16 µg/ml       | 1.2                | 1.8                | 97.0               |
| Tigecycline         | ≤0.5 µg/ml      | 94.5               | N/A                | 5.5                |
| Amikacin            | ≤16–≥64 µg/ml   | 17.1               | 6.1                | 76.8               |

<sup>a</sup>S = Susceptible.<sup>b</sup>I = Intermediate.<sup>c</sup>R = Resistant.<sup>d</sup>N/A = Not applicable.**Table S2.** Antimicrobial treatment options for patients receiving CAZ/AVI-based or PMB-based therapeutic regimens

| Antimicrobial treatment option | CAZ/AVI group |                                    |                  | PMB group |                                    |                  |
|--------------------------------|---------------|------------------------------------|------------------|-----------|------------------------------------|------------------|
|                                | n = 82        | 30-day microbiological eradication | 30-day mortality | n = 82    | 30-day microbiological eradication | 30-day mortality |
| Monotherapy                    | 33            | 22 (66.7)                          | 17 (51.5)        | 22        | 8 (36.4)                           | 16 (69.6)        |
| Combination therapy            | 49            | 44 (89.8)                          | 12 (24.5)        | 60        | 19 (31.7)                          | 41 (68.3)        |
| Carbapenems                    | 17            | 14 (82.4)                          | 5 (29.4)         | 19        | 6 (31.6)                           | 11 (57.9)        |
| Tigecycline                    | 11            | 11 (100)                           | 3 (27.3)         | 11        | 4 (36.4)                           | 8 (72.7)         |
| Amikacin                       | 11            | 11 (100)                           | 1 (9.1)          | 15        | 7 (46.7)                           | 11 (73.3)        |
| Fosfomycin                     | 7             | 5 (71.4)                           | 3 (42.9)         | 10        | 0 (0)                              | 9 (90)           |
| Aztreonam                      | 2             | 2 (100)                            | 0 (0)            | 0         | -                                  | -                |
| Other Drugs                    | 1             | 1 (100)                            | 0 (0)            | 5         | 2 (40)                             | 2 (40)           |
| Minocycline                    | 1             | 1 (100)                            | 0 (0)            | 3         | 1 (33.3)                           | 1 (33.3)         |
| Moxifloxacin                   | 0             | -                                  | -                | 1         | 1 (100)                            | 0 (0)            |
| SMZ/TMP <sup>a</sup>           | 0             | -                                  | -                | 1         | 0 (0)                              | 1 (100)          |

<sup>a</sup>SMZ/TMP = sulfamethoxazole/trimethoprim.**Table S3.** Comparison of safety between CAZ/AVI group and PMB group with different types of laboratory parameters.

| Group   | Laboratory parameters | Before Treatment | After Treatment | P-value |
|---------|-----------------------|------------------|-----------------|---------|
| CAZ/AVI | ALT (U/L)             | 23 (14-30.3)     | 28.5 (17.8-45)  | <0.001  |

|     |               |                   |                   |        |
|-----|---------------|-------------------|-------------------|--------|
|     | AST (U/L)     | 29.5 (21.5-44.3)  | 34 (22.5-73.8)    | 0.035  |
|     | TBil (µmol/L) | 15.9 (12.7-21.3)  | 17.5 (10.5-27.7)  | 0.487  |
|     | CrCl (mL/min) | 76.7 (46.4-119.8) | 80.0 (41.6-120.7) | 0.310  |
|     | BUN (mmol/L)  | 8.6 (6.1-13.1)    | 11.9 (6.3-26.0)   | 0.013  |
|     | APTT (s)      | 32.5 (28.9-39.0)  | 32.2 (28.1-36.9)  | 0.240  |
|     | PT (s)        | 13.6 (12.7-15.5)  | 14.2 (12.3-17.2)  | 0.085  |
|     | Fib (g/L)     | 2.8 (2.1-3.6)     | 3.3 (2.3-4.7)     | 0.112  |
| PMB | ALT (U/L)     | 17 (10-41)        | 19 (12.5-34)      | 0.683  |
|     | AST (U/L)     | 28 (18.5-56)      | 28 (19-69.5)      | 0.431  |
|     | TBil (µmol/L) | 14.8 (11.3-25.7)  | 18.4 (11.1-46.1)  | 0.062  |
|     | CrCl (mL/min) | 56.8 (39.0-95.1)  | 48.3 (30.9-70.6)  | <0.001 |
|     | BUN (mmol/L)  | 13.4 (7.3-26.0)   | 7.2 (4.1-11.5)    | <0.001 |
|     | APTT (s)      | 31.0 (28.3-34.3)  | 32.2 (28.7-35.5)  | 0.482  |
|     | PT (s)        | 13.4 (12.2-15.3)  | 13.8 (12.1-16.7)  | 0.235  |
|     | Fib (g/L)     | 3.5 (2.8-4.4)     | 3.6 (3.0-4.4)     | 0.434  |

---

*Statistical methods: Wilcoxon rank sum test*
